# Supplementary material for: Comprehensive identification of RNA transcripts and construction of RNA network in chronic obstructive pulmonary disease
Source: PubMed Central journal article supplement (PMC9188256; doi:10.1186/s12931-022-02069-8), 2022-06-11

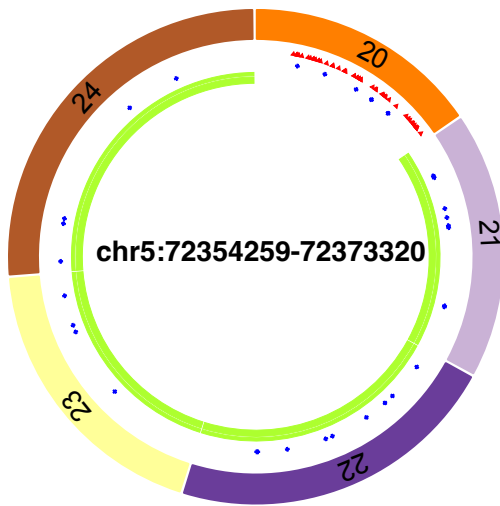

**circFCHO2**  
hsa\_circ\_0002490

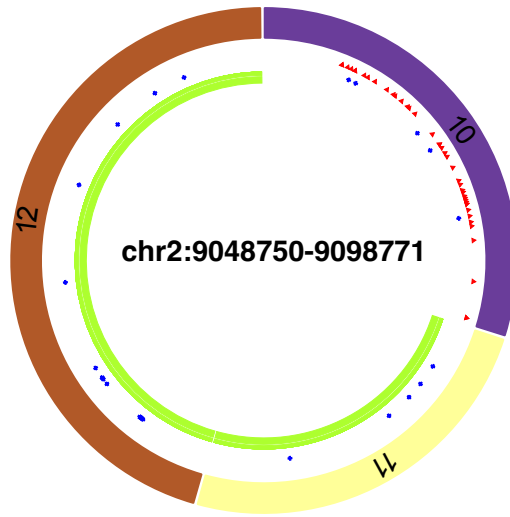

**circMBOAT2**  
hsa\_circ\_0000972

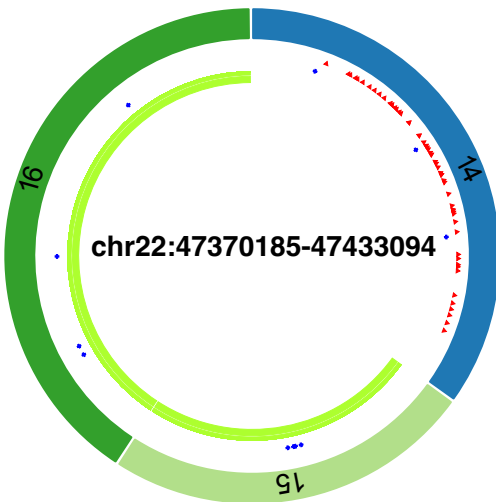

**circTBC1D22A**  
hsa\_circ\_0002406

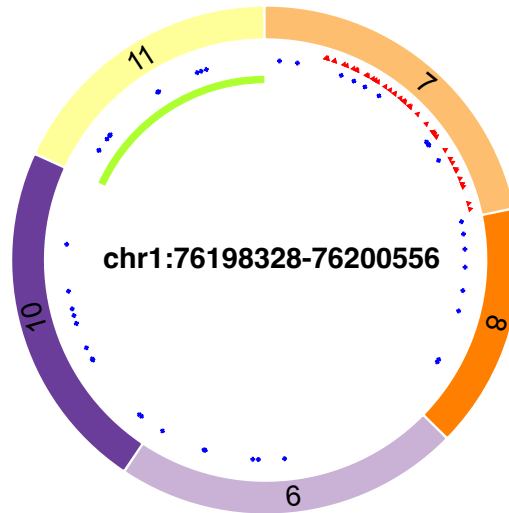

**circACADM**  
hsa\_circ\_0012963

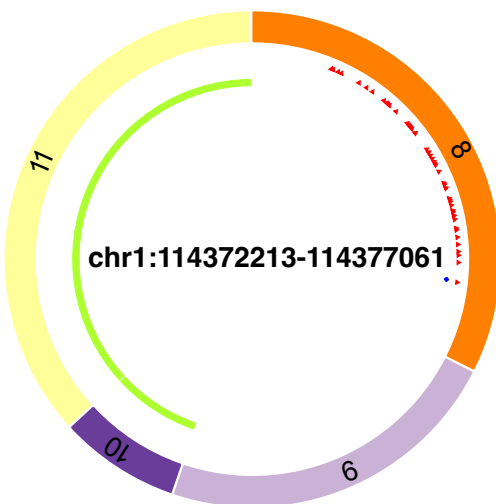

**circPTPN22**  
hsa\_circ\_0000110

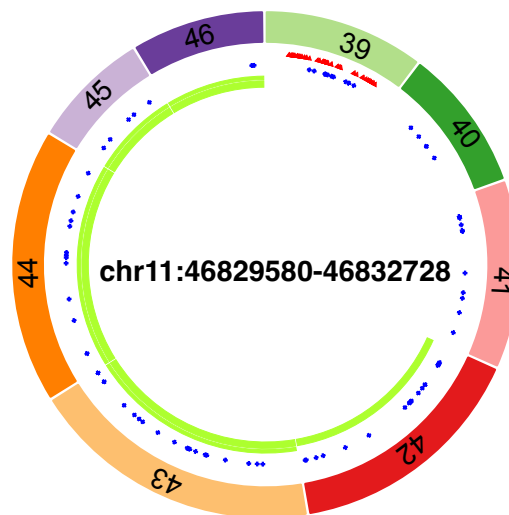

**circCKAP5**  
hsa\_circ\_0095899

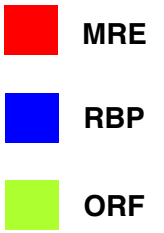

Supplement: 12931_2022_2069_MOESM1_ESM.pdf [file 12931_2022_2069_MOESM1_ESM.pdf]
