# Supplementary material for: Comprehensive identification of RNA transcripts and construction of RNA network in chronic obstructive pulmonary disease
Source: PubMed Central journal article supplement (PMC9188256; doi:10.1186/s12931-022-02069-8), 2022-06-11

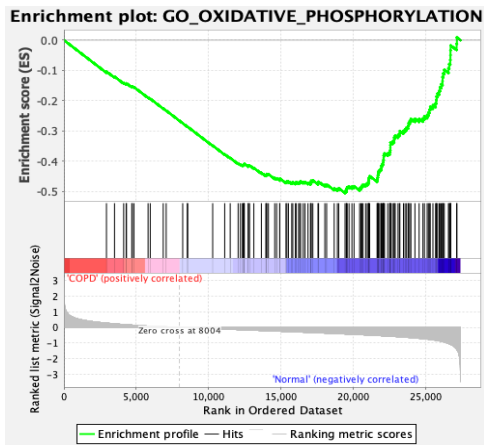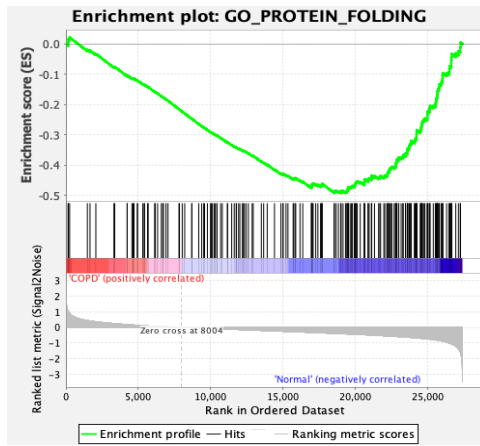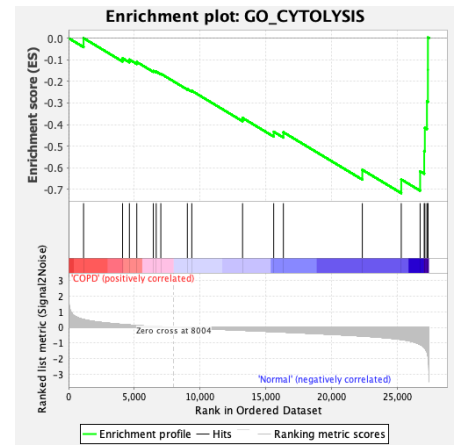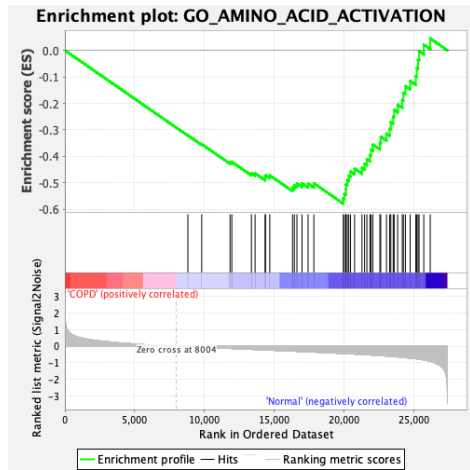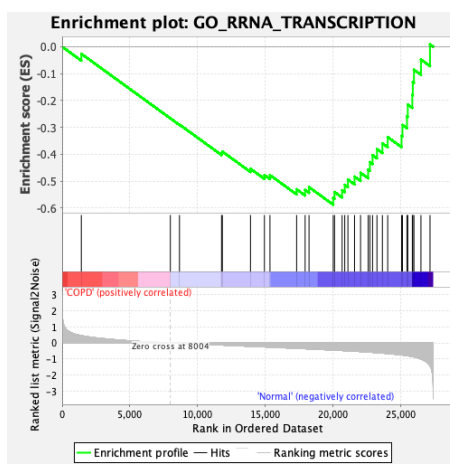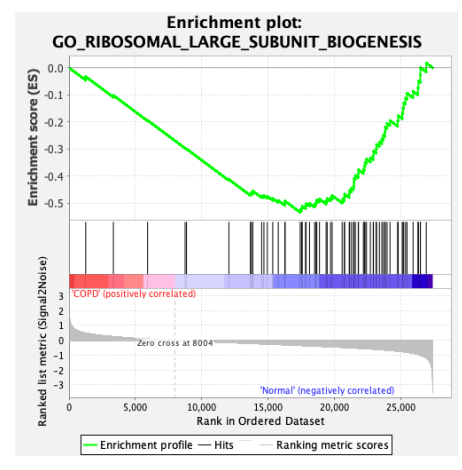

Supplement: 12931_2022_2069_MOESM2_ESM.pdf [file 12931_2022_2069_MOESM2_ESM.pdf]
