# Supplementary material for: Comprehensive identification of RNA transcripts and construction of RNA network in chronic obstructive pulmonary disease
Source: PubMed Central journal article supplement (PMC9188256; doi:10.1186/s12931-022-02069-8), 2022-06-11
Supplement: 12931_2022_2069_MOESM3_ESM.pdf [file 12931_2022_2069_MOESM3_ESM.pdf]

Table S1. Primers used in this study

| Name           | Primer sequence 5' to 3'  | Number of bases |
|----------------|---------------------------|-----------------|
| circFCHO2-F    | TCCAGCTGTGTTGTGCTTCA      | 20              |
| circFCHO2-R    | CAAATAGGGGGTCCCAAGCA      | 20              |
| circMBOAT2-F   | GGATACCTCACAGTGTGCCA      | 20              |
| circMBOAT2-R   | GTTCGAAACCAAATGGCTGCT     | 21              |
| circPTPN22-F   | ACAGACACTGAAGACTCCTGG     | 21              |
| circPTPN22-R   | TGTTCCACCCCATTCAGTG       | 20              |
| circTBC1D22A-F | TTCCGCTGGATGAACAACCT      | 20              |
| circTBC1D22A-R | TCATGCACCAGTAGGTGTCG      | 20              |
| circACADM-F    | ATTCTTTGGGGCAAATGCCTA     | 21              |
| circACADM-R    | ATATTCTGCAGCCACTGGGAT     | 21              |
| circCKAP5-F    | GGAAGCTGGCGATTATGCAG      | 20              |
| circCKAP5-R    | ATCTCGAACAGCCTTCTCTCG     | 21              |
| CLGN-F         | CACTGGGCTGCAGATGGTTG      | 20              |
| CLGN-R         | TATTGGCACTCCTGCTGTAC      | 21              |
| GPR42-F        | GCAGAGCATTGGGGTCTCA       | 20              |
| GPR42-R        | CACCGAGAAGACGAACCAGT      | 20              |
| RSAD2-F        | CCTGCTTGGTGCCTGAATCT      | 20              |
| RSAD2-R        | CAGGATGGACTTGAAGGGTC      | 21              |
| HLA-DPA1-F     | CCCAGGGGACCCTGTGAAAT      | 20              |
| HLA-DPA1-R     | GAGTTTGTAGGGCAGCTGGAG     | 21              |
| TMEM17-F       | ATCTGGGCTACGTGGGTAAC      | 20              |
| TMEM17-R       | CCAAGGGCAGATTTGTTAGGC     | 21              |
| AC099332.1-F   | GGAAACATTCATTGCCACATGC    | 22              |
| AC099332.1-R   | ACATTTCTGTCCCTGTTACAC     | 23              |
| LINC02573-F    | TGTGCGTGAATCAAACCAGAG     | 21              |
| LINC02573-R    | ATTGTAAGGTTGCTGGCTGGA     | 21              |
| AL445493.3-F   | CCACAATTGTTGGGAGGATTTGT   | 23              |
| AL445493.3-R   | TGTGTGAAGTGGTTATGATTCCA   | 23              |
| HCG27-F        | ACGGAGGCTTTACAAAATAAAATCA | 25              |
| HCG27-R        | AACACCTGCCTGAGCTTACA      | 20              |
| AP000465.1-F   | TGATTTTCAGGGAGGCATGTTG    | 22              |
| AP000465.1-R   | CAAAGGCTCCCAGTGCCTAC      | 20              |
| GAPDH-F        | CTTCATTGACCTCAACTACATGG   | 23              |
| GAPDH-R        | CTCGCTCCTGGAAGATGGTGAT    | 22              |
